# Supplementary material for: Suitability of Gelatin Methacrylate and Hydroxyapatite Hydrogels for 3D Bioprinted Bone Tissue
Source: Preprints.org preprint supplement (doi:10.20944/preprints202312.2084.v1), 2023-12-27
Supplement: Supplementary file 1 [file supplementary]

Supplemental Figures


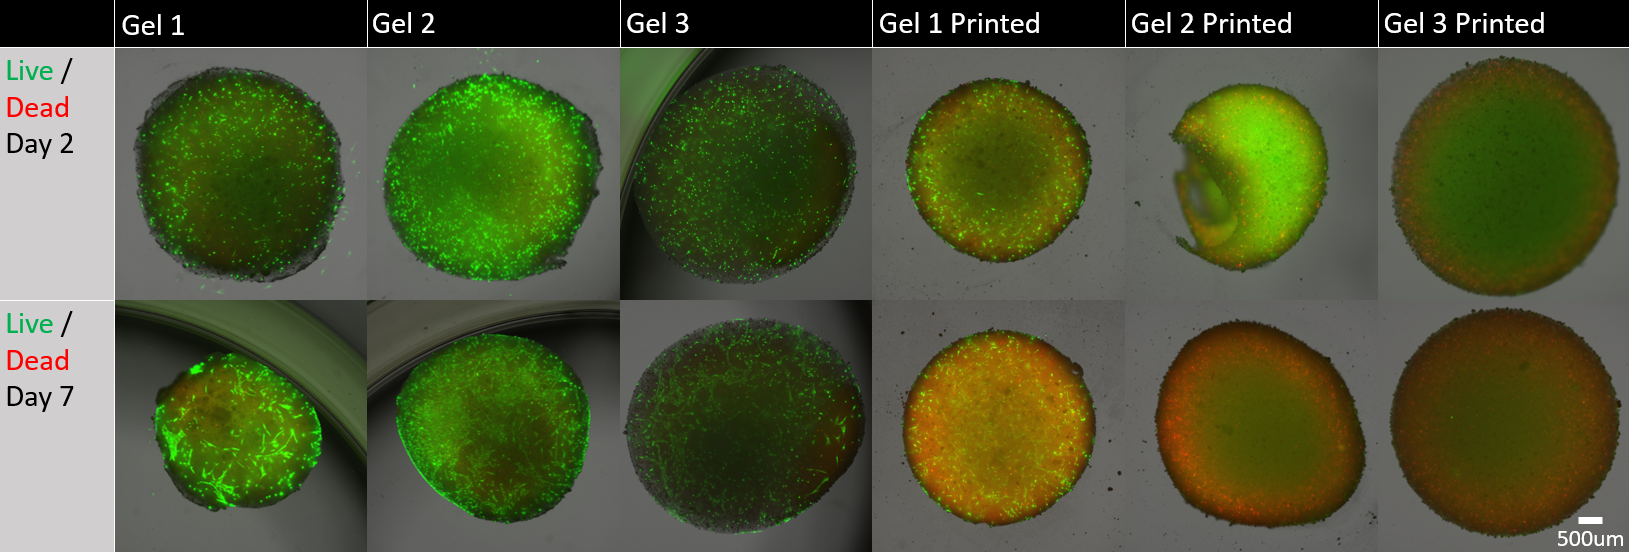


**Supplemental Figure 1. – Cell viability in GelMA/HA bioinks:** Live hMSC cells stained green and dead hMSC cells stained red, composite images are shown. Printed gel 2 and 3 were not quantifiable and were not analyzed for cell viability.
